# Supplementary material for: Novel fluorescent chemosensing of CN− anions with nanomolar detection using the Zn2+–isonicotinohydrazide metal complex
Source: Royal Society of Chemistry journal article supplement (doi:10.1039/c4ra06358a), 2014-01-01
Supplement: c4ra06358a1.pdf [file c4ra06358a1.pdf]

### Supporting information

#### Novel fluorescent chemosensing of $\text{CN}^-$ anion with nanomolar detection using $\text{Zn}^{2+}$ -isonicotinohydrazide metal complex

Kundan Tayade<sup>a</sup>, Nilesh Khairnar<sup>a</sup>, Shilpa Bothra<sup>b</sup>, Suban K. Sahoo<sup>b</sup>, Jasminder Singh<sup>c</sup>,  
Narinder Singh<sup>c</sup>, Ratnamala Bendre<sup>\*a</sup>, Anil Kuwar<sup>\*a</sup>

<sup>a</sup>School of Chemical Sciences, North Maharashtra University, Jalgaon, 425001 (MS) India

<sup>b</sup>Department of Applied Chemistry, SV National Institute Technology, Surat-395007 (Gujrat) India.

<sup>c</sup>Department of Chemistry, Indian Institute Technology, Ropar-140 001 (Punjab) India.

\*Corresponding author -E-mail: [kuwaras@gmail.com](mailto:kuwaras@gmail.com), [bendreras@rediffmail.com](mailto:bendreras@rediffmail.com)

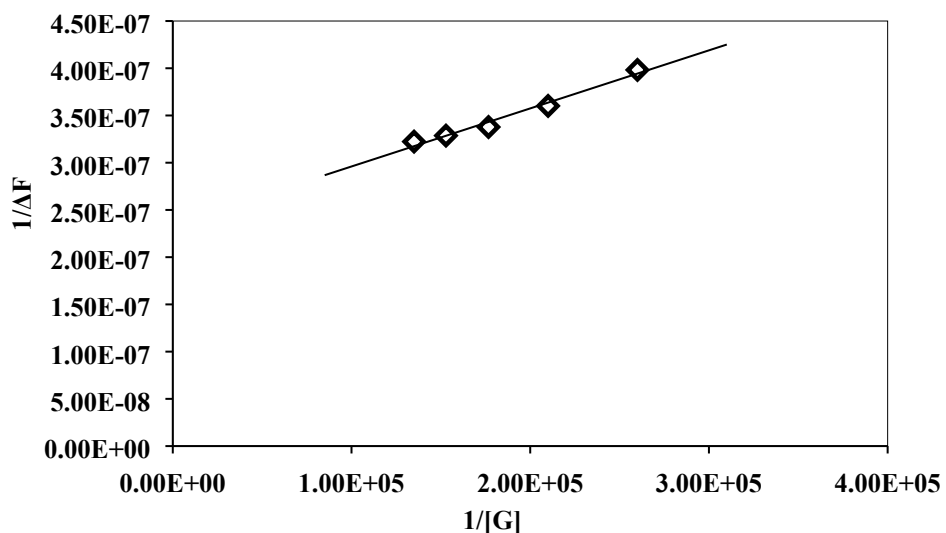

**Figure S1.** A Benesi-Hildebrand methodology for receptor  $\text{ZnL}$ ,  $K_a = 3.33 \times 10^5 \text{ M}^{-1}$ .

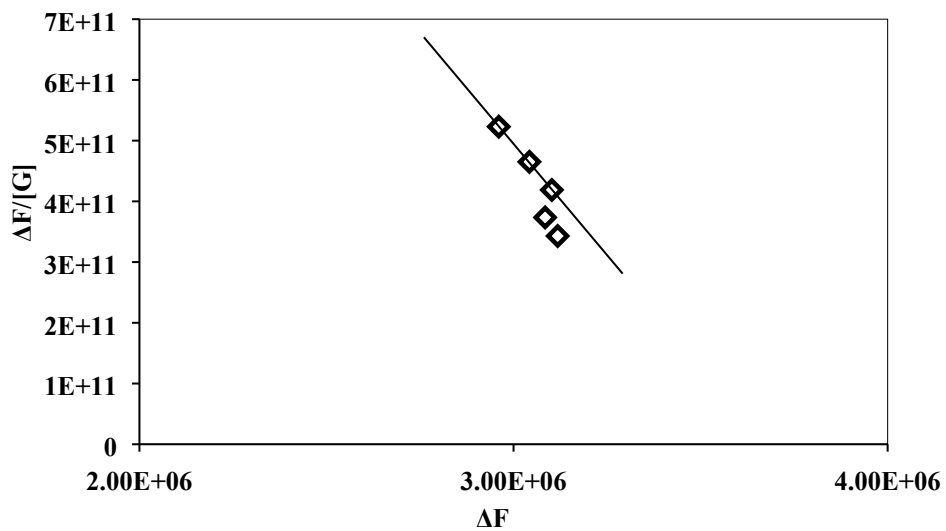

**Figure S2.** A Scatchard methodology for receptor **ZnL**,  $K_a = 7.73 \times 10^4 \text{ M}^{-1}$ .

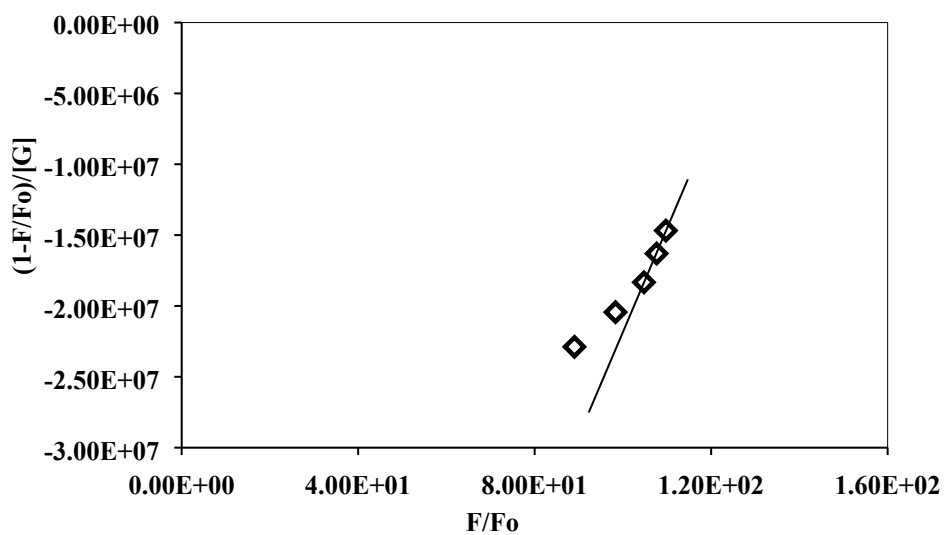

**Figure S3.** Connor's fitting method for receptor **ZnL**,  $K_a = 8.62 \times 10^4 \text{ M}^{-1}$ .

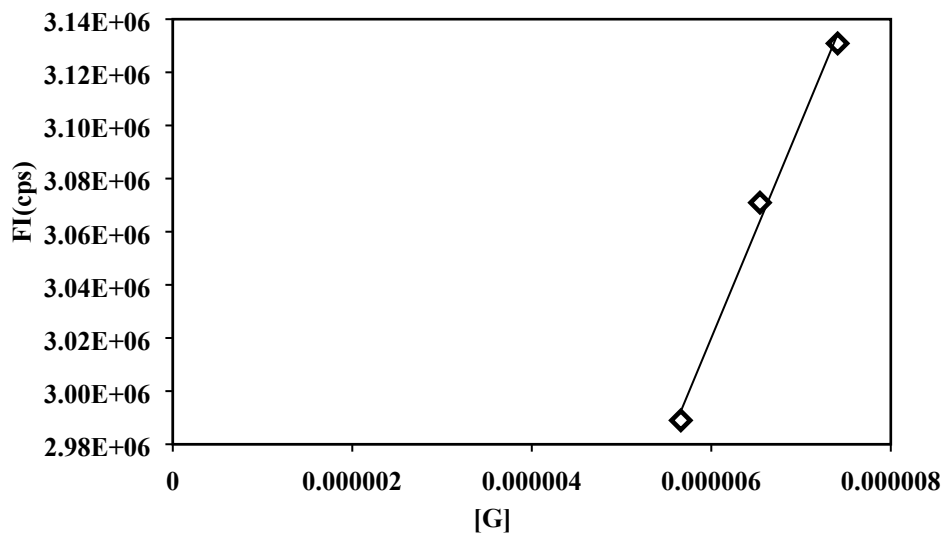

Figure S4. Plot of the emission intensity as a function of the concentrations of  $\text{CN}^-$ .

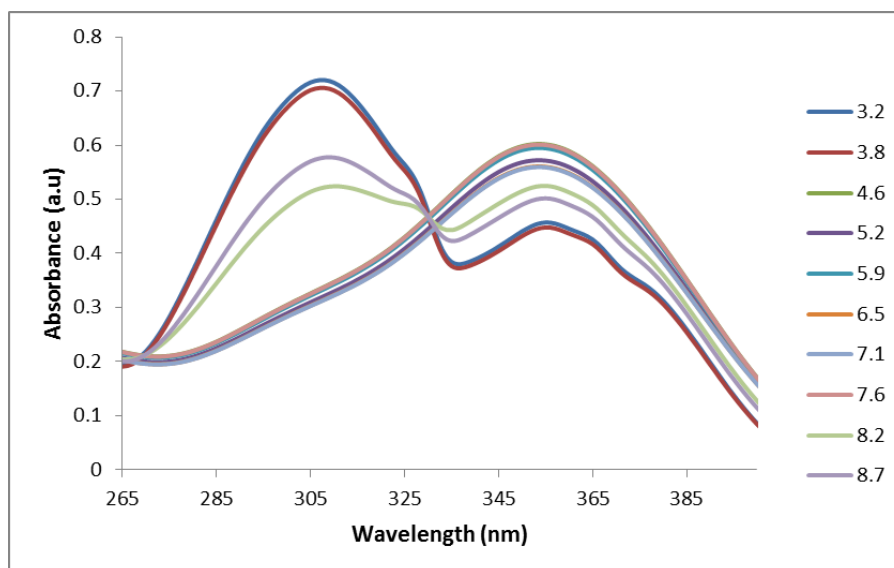

Figure S5. Plot of pH titration of  $\text{ZnL-CN}^-$  complex.

**Table S1.** Comparison of reported detection limit with present work

| <i>Solvent System</i>               | <i>Detection Limit</i> | <i>Response</i> | <i>References</i>   |
|-------------------------------------|------------------------|-----------------|---------------------|
| water                               | >20 $\mu\text{M}$      | quenching       | 1                   |
| water                               | 0.13 ppm               | Blue shifting   | 2                   |
| DMF/H <sub>2</sub> O                | 1.0 $\mu\text{M}$      | Enhancement     | 3                   |
| CH <sub>3</sub> CN:H <sub>2</sub> O | 0.037 $\mu\text{M}$    | Blue shifting   | 4                   |
| DMSO/H <sub>2</sub> O (1:1, v/v)    | 5.49 nM                | Enhancement     | <b>Present Work</b> |

### References

1. Y.K. Yang, J. Tae, Org. Lett, 2006, 8, 25, 5721.
2. X. Lou, L. Zhang, J. Qin, Z. Li, Chem. Commun., 2008, 5848.
3. G. Qian, X. Lic, Z. Y. Wang, J. Mater. Chem., 2009, 19, 522.
4. S. Goswami, A. Manna, S. Paul, K. Aich, A. K.Das, S. Chakraborty, Tetrahedron Letters, 2013, 54, 1785.
